# Supplementary material
Source: PubMed Central journal article supplement (PMC4194088)
Supplement: embj0033-1438-sd1.pdf [file embj0033-1438-sd1.pdf]

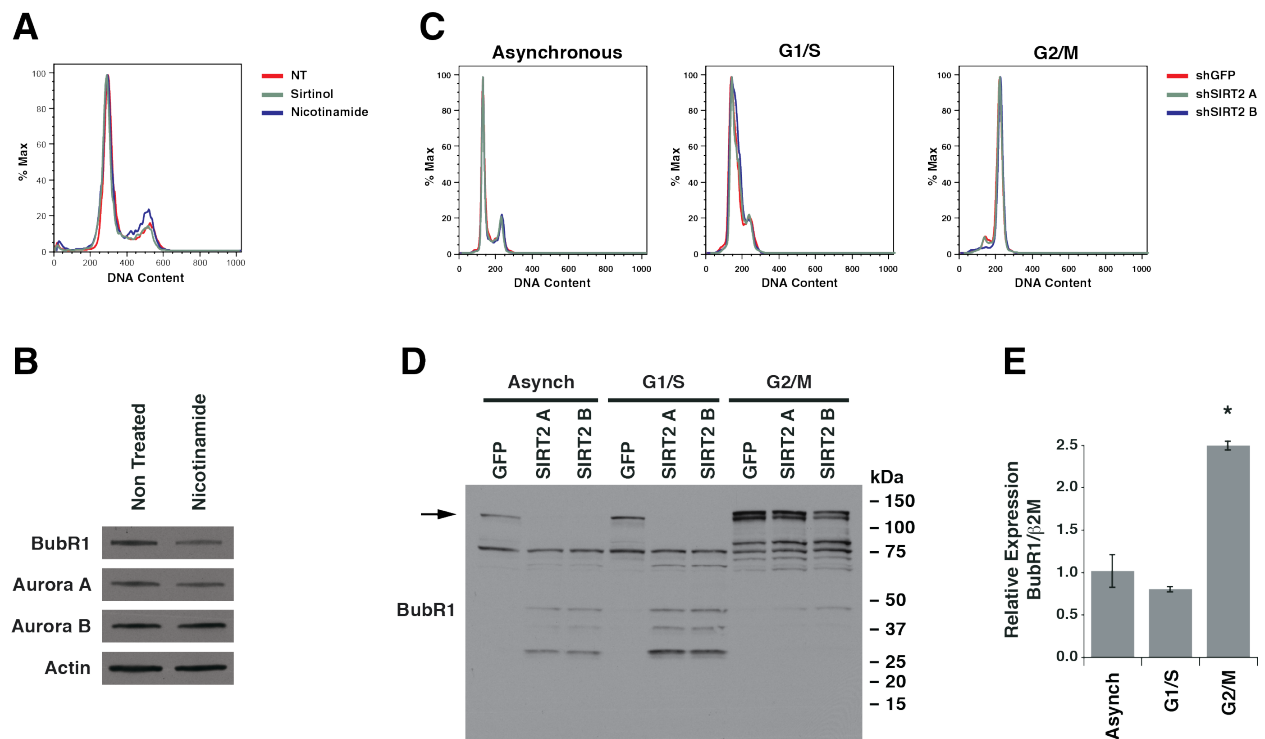

**Figure S1.** BubR1 abundance is modulated by SIRT2. (A) Flow cytometric analysis of propidium iodide staining of HeLa cells untreated or treated with nicotinamide or sirtinol. (B) MEFs untreated or treated with nicotinamide or sirtinol were western blotted for BubR1, Aurora A, Aurora B, and Actin. (C). HeLa cells expressing control shRNA or two SIRT2 shRNAs were either left asynchronous or arrested at G1/S phase or G2/M phase of the cell cycle were stained with propidium iodide and analyzed by flow cytometry. (D) Cells from (C) were western blotted for BubR1. (E) Gene expression of BubR1 normalized to  $\beta 2$  microglobulin in HeLa cells expressing control shRNA and were either left asynchronous or arrested at G1/S phase or G2/M phase of the cell cycle. Error bars represent SEM. *P* values calculated using Student's *t*-test ( $n = 3$ ), \*  $P < 0.05$ , \*\*  $P < 0.005$ .
