# Supplementary material
Source: PubMed Central journal article supplement (PMC4194088)
Supplement: embj0033-1438-sd2.pdf [file embj0033-1438-sd2.pdf]

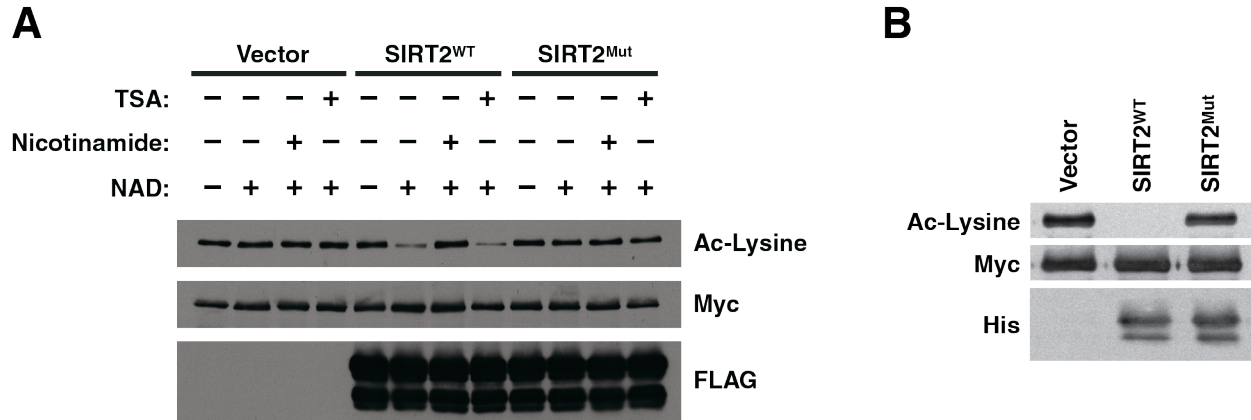

**Figure S2.** Reversible acetylation of BubR1 by CBP and SIRT2. (A) Wild-type and a catalytically inactive mutant of SIRT2 enzymes and acetylated BubR1 purified from 293T cells were incubated *in vitro* with NAD<sup>+</sup>, in the presence or absence of deacetylase inhibitors nicotinamide (NAM) or trichostatin A (TSA). Reactions were western blotted for Ac-lysine, Myc and FLAG. (B) Immunoprecipitated acetylated Myc-BubR1 was deacetylated with wild-type and a catalytically inactive rSIRT2 and western blotted for Ac-lysine, Myc and His.
