# Supplementary material
Source: PubMed Central journal article supplement (PMC4194088)
Supplement: embj0033-1438-sd4.pdf [file embj0033-1438-sd4.pdf]

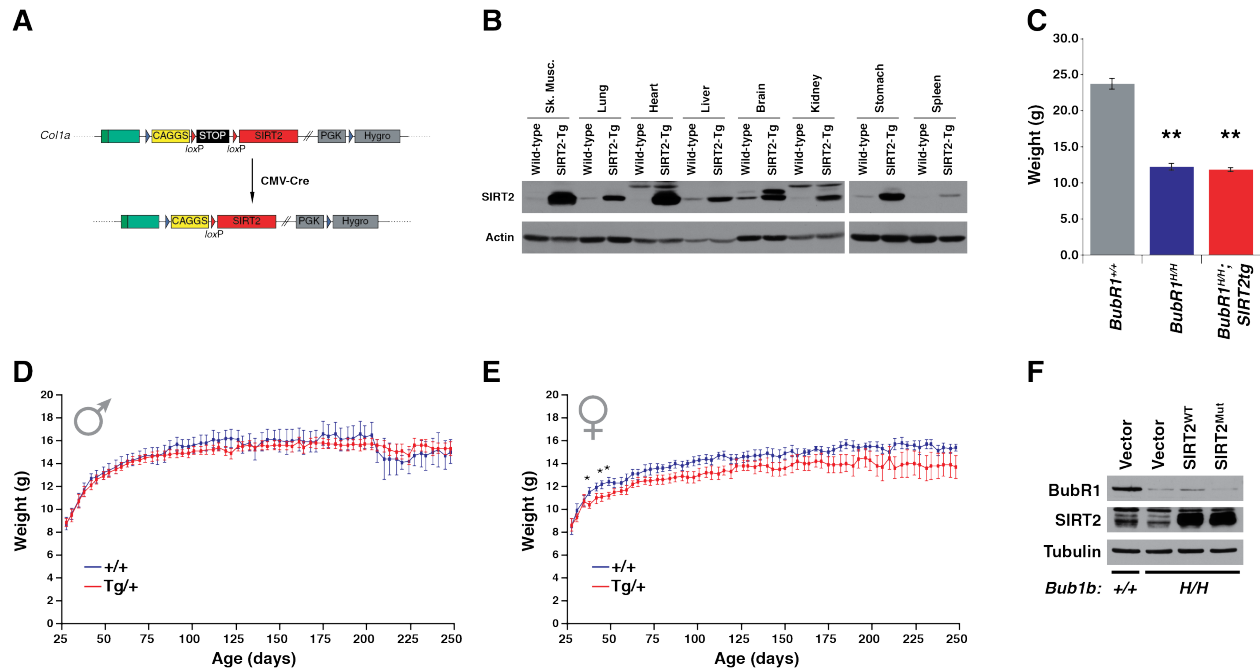

**Figure S4.** Generation of *SIRT2tg* mice and weight analysis of *SIRT2tg/BubR1<sup>HHH</sup>* cohort. (A) Schematic diagram of SIRT2 transgenic with Stop cassette flanked by *loxP* sites localized between the CAGGS promoter and SIRT2 cDNA. (B) Ubiquitous overexpression of SIRT2 in transgenic mice. Extracts were prepared from non-transgenic and SIRT2 transgenic and western blotted for SIRT2 and Actin. (C) *SIRT2tg* does not rescue small size phenotype of *BubR1<sup>HHH</sup>* mice. Weights of animals ( $n = 6$  each group) at 6 weeks of age. Body weights of (D) male and (E) female *BubR1<sup>HHH</sup>* and *SIRT2tg/BubR1<sup>HHH</sup>* mice from weaning to 250 days of age from longevity cohort. (F) MEFs from wild-type and *BubR1<sup>HHH</sup>* embryos infected with control virus or virus expressing wild-type or catalytically inactive SIRT2 were western blotted for BubR1, SIRT2, and Tubulin. Error bars represent SEM.  $P$  values calculated using Student's  $t$ -test ( $n = 3$ ), \*  $P < 0.05$ , \*\*  $P < 0.005$ .
