# Supplementary material
Source: PubMed Central journal article supplement (PMC4194088)
Supplement: embj0033-1438-sd5.pdf [file embj0033-1438-sd5.pdf]

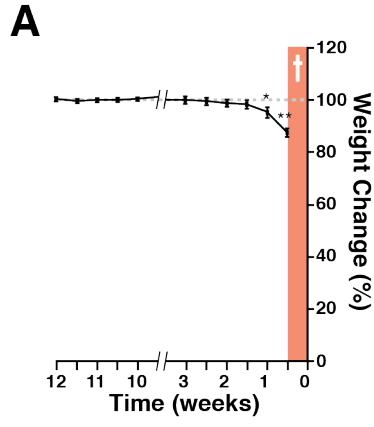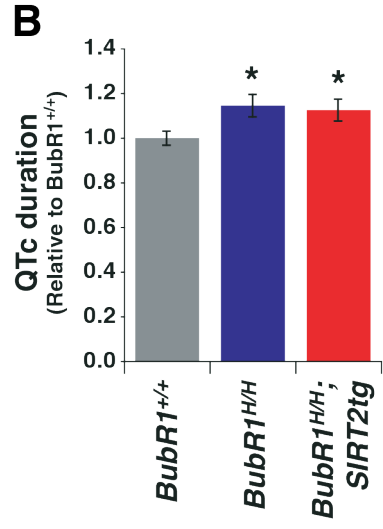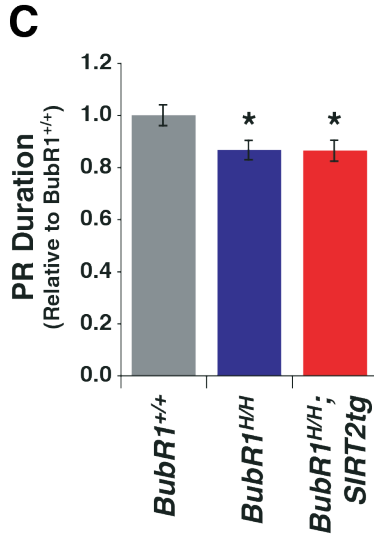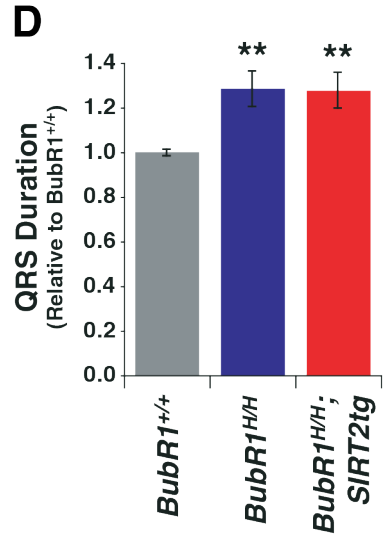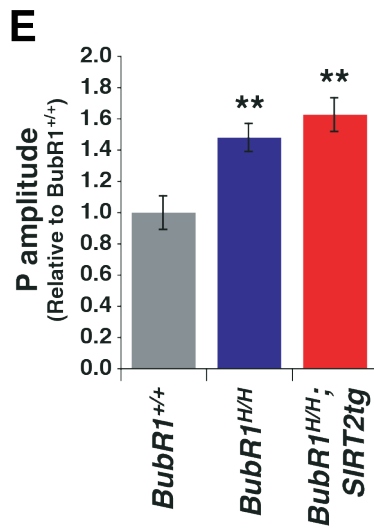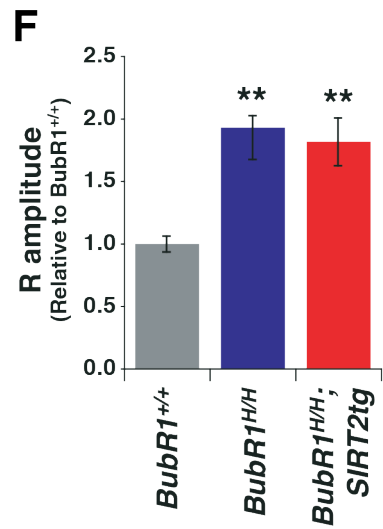

**Figure S5.** Electrocardiography analysis of male wild-type, *BubR1<sup>HH</sup>*, and *SIRT2tg; BubR1<sup>HH</sup>* mice. (A) Change in body weight during the final 12 weeks prior to death of all mice in lifespan study that had reached a stable weight. Percent weight is the variation in weight compared to average weight of previous 4 weeks. (B) QTc duration, (C) PR duration, (D) QRS Duration, (E) P wave amplitude, and (F) R wave amplitude from electrocardiography measurements of wild-type, *BubR1<sup>HH</sup>*, and *SIRT2tg; BubR1<sup>HH</sup>* mice. Error bars represent SEM. *P* values calculated using Student's *t*-test (*n* as specified in Figure 5), \* *P* < 0.05, \*\* *P* < 0.005.
