# Supplementary material
Source: PubMed Central journal article supplement (PMC4194088)
Supplement: embj0033-1438-sd6.pdf [file embj0033-1438-sd6.pdf]

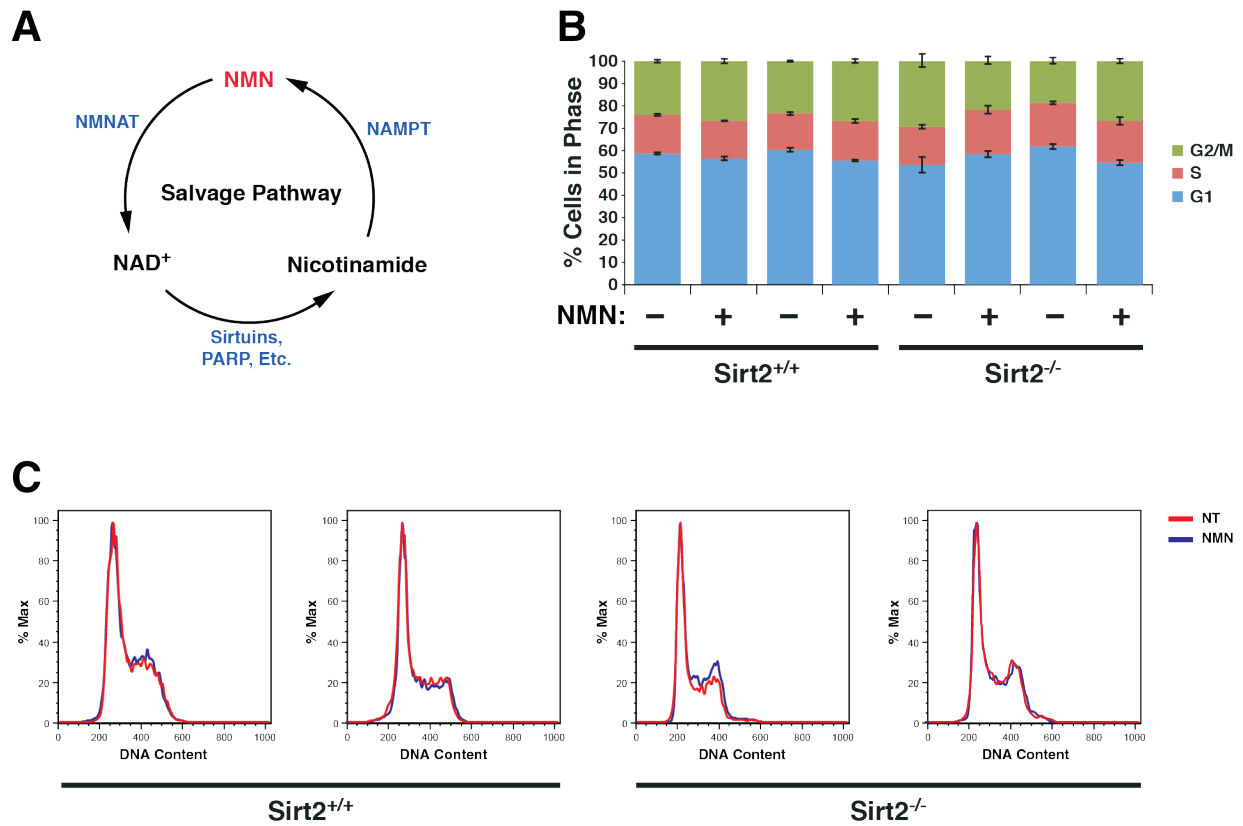

**Figure S6.** Treatment with NMN does not influence cell cycle profiles (A) Schematic of the  $\text{NAD}^+$  salvage pathway in mammals. (B) Quantification of cell cycle stage distribution of MEFs with or without NMN treatment. (C) Flow cytometry analysis plots of MEFs with or without NMN treatment.
